# Supplementary material for: Chemistry and Bioactivity of Microsorum scolopendria (Polypodiaceae): Antioxidant Effects on an Epithelial Damage Model
Source: MDPI journal article supplement (doi:10.3390/molecules27175467), 2022-08-25
Supplement: s1 [file s1]

# Supplementary Material

**Table S1.** Phenolic acids found in MS by RP-HPLC-MS/MS in negative mode.

| Name                                | Molecular Formula                               | Subclass             | Expected Mass (m/z) | Expected Retention Time (s) | HAE                |                              |                     |                      | RAE                |                              |                     |                      |
|-------------------------------------|-------------------------------------------------|----------------------|---------------------|-----------------------------|--------------------|------------------------------|---------------------|----------------------|--------------------|------------------------------|---------------------|----------------------|
|                                     |                                                 |                      |                     |                             | Retention Time (s) | Retention Time Variation (s) | Observed Mass (m/z) | Mass Variation (m/z) | Retention Time (s) | Retention Time Variation (s) | Observed Mass (m/z) | Mass Variation (m/z) |
| 24-methyl cholesterol ferulate      | C <sub>38</sub> H <sub>56</sub> O <sub>4</sub>  | Hydroxycinnamic acid | 576,85              | 0,77                        | NA                 | NA                           | NA                  | NA                   | 0,76               | 0,01                         | 578,87              | -2,02                |
| Avenanthramide 2F                   | C <sub>17</sub> H <sub>15</sub> NO <sub>6</sub> | Hydroxycinnamic acid | 329,3               | 18,42                       | NA                 | NA                           | NA                  | NA                   | 18,65              | -0,23                        | 329,3               | 0                    |
| 4-glycogallic acid                  | C <sub>13</sub> H <sub>16</sub> O <sub>10</sub> | Hydroxybenzoic acid  | 332,26              | 20,92                       | 20,91              | 0,01                         | 332,25              | 0,01                 | 20,93              | -0,01                        | 332,25              | 0,01                 |
| Galloyl glucosa                     | C <sub>13</sub> H <sub>16</sub> O <sub>10</sub> | Hydroxybenzoic acid  | 332,07              | 20,92                       | 20,91              | 0,01                         | 332,25              | -0,18                | 20,93              | -0,01                        | 332,25              | -0,18                |
| Sinapine                            | C <sub>16</sub> H <sub>24</sub> NO <sub>5</sub> | Hydroxycinnamic acid | 310,37              | 21,8                        | 21,62              | 0,18                         | 310,36              | 0,01                 | NA                 | NA                           | NA                  | NA                   |
| Ellagic acid glucoside              | C <sub>20</sub> H <sub>16</sub> O <sub>13</sub> | Hydroxybenzoic acid  | 464,34              | 22,52                       | 22,51              | 0,01                         | 464,32              | 0,02                 | 22,53              | -0,01                        | 464,32              | 0,02                 |
| Protocatechuic acid 4-O-glucoside   | C <sub>13</sub> H <sub>16</sub> O <sub>9</sub>  | Hydroxybenzoic acid  | 316,26              | 22,29                       | 22,94              | -0,65                        | 316,26              | 0                    | 22,97              | -0,68                        | 316,26              | 0                    |
| P-coumaroyl tartaric acid           | C <sub>13</sub> H <sub>12</sub> O <sub>8</sub>  | Hydroxycinnamic acid | 296,23              | 23,55                       | 23,57              | -0,02                        | 296,23              | 0                    | 23,6               | -0,05                        | 296,23              | 0                    |
| Caffeoyl tartaric acid              | C <sub>13</sub> H <sub>12</sub> O <sub>9</sub>  | Hydroxycinnamic acid | 312,23              | 23,85                       | 23,86              | -0,01                        | 312,23              | 0                    | 23,88              | -0,03                        | 312,23              | 0                    |
| 4-hydroxybenzoic acid 4-O-glucoside | C <sub>13</sub> H <sub>16</sub> O <sub>8</sub>  | Hydroxybenzoic acid  | 300,26              | 25,42                       | 25,44              | -0,02                        | 300,26              | 0                    | 25,46              | -0,04                        | 300,26              | 0                    |
| Ellagic acid acetyl arabinoside     | C <sub>21</sub> H <sub>16</sub> O <sub>13</sub> | Hydroxybenzoic acid  | 476,34              | 25,59                       | 25,57              | 0,02                         | 476,35              | -0,01                | 25,61              | -0,02                        | 476,35              | -0,01                |
| Ellagic acid acetyl-xyloside        | C <sub>21</sub> H <sub>16</sub> O <sub>13</sub> | Hydroxybenzoic acid  | 476,34              | 25,59                       | 25,57              | 0,02                         | 476,35              | -0,01                | 25,61              | -0,02                        | 476,35              | -0,01                |
| Feruloyl tartaric acid              | C <sub>14</sub> H <sub>14</sub> O <sub>9</sub>  | Hydroxycinnamic acid | 326,26              | 28,7                        | 28,7               | 0                            | 326,27              | -0,01                | NA                 | NA                           | NA                  | NA                   |

NA: Not among the most abundant in the extract.

**Table S2.** Phenolic acids found in *MS* by RP-HPLC-MS/MS in positive mode.

| Name                              | Molecular Formula                               | Subclass                     | Expected Mass (m/z) | Expected Retention Time (s) | HAE                |                              |                     |                      | RAE                |                              |                     |                      |
|-----------------------------------|-------------------------------------------------|------------------------------|---------------------|-----------------------------|--------------------|------------------------------|---------------------|----------------------|--------------------|------------------------------|---------------------|----------------------|
|                                   |                                                 |                              |                     |                             | Retention Time (s) | Retention Time Variation (s) | Observed Mass (m/z) | Mass Variation (m/z) | Retention Time (s) | Retention Time Variation (s) | Observed Mass (m/z) | Mass Variation (m/z) |
| Dihydrocaffeic acid               | C <sub>9</sub> H <sub>10</sub> O <sub>4</sub>   | Hydroxyphenyl propanoic acid | 182,17              | 18,69                       | 18,83              | -0,14                        | 182,16              | 0,01                 | 18,76              | -0,07                        | 182,16              | 0,01                 |
| Homovanillic acid                 | C <sub>9</sub> H <sub>10</sub> O <sub>4</sub>   | Hydroxyphenylacetic acid     | 182,17              | 18,69                       | 18,83              | -0,14                        | 182,16              | 0,01                 | 18,76              | -0,07                        | 182,16              | 0,01                 |
| Caffeic acid                      | C <sub>9</sub> H <sub>8</sub> O <sub>4</sub>    | Hydroxycinnamic acid         | 180,16              | 18,75                       | 18,61              | 0,14                         | 180,15              | 0,01                 | 18,61              | 0,14                         | 180,15              | 0,01                 |
| Gallic acid 4-O-glucoside         | C <sub>13</sub> H <sub>16</sub> O <sub>10</sub> | Hydroxybenzoic acid          | 332,26              | 20,92                       | 20,92              | 0                            | 332,27              | -0,01                | 21                 | -0,08                        | 332,25              | 0,01                 |
| Galloyl glucose                   | C <sub>13</sub> H <sub>16</sub> O <sub>10</sub> | Hydroxybenzoic acid          | 332,26              | 20,92                       | 20,92              | 0                            | 332,27              | -0,01                | 21                 | -0,08                        | 332,25              | 0,01                 |
| Ellagic acid glucoside            | C <sub>20</sub> H <sub>16</sub> O <sub>13</sub> | Hydroxybenzoic acid          | 464,34              | 22,52                       | 22,27              | 0,25                         | 464,32              | 0,02                 | 22,27              | 0,25                         | 464,32              | 0,02                 |
| P-coumaroyl malic acid            | C <sub>13</sub> H <sub>12</sub> O <sub>7</sub>  | Hydroxycinnamic acid         | 280,23              | 22,56                       | 22,61              | -0,05                        | 280,23              | 0                    | 22,59              | -0,03                        | 280,23              | 0                    |
| P-coumaric acid                   | C <sub>9</sub> H <sub>8</sub> O <sub>3</sub>    | Hydroxycinnamic acid         | 164,16              | 22,67                       | 22,69              | -0,02                        | 164,15              | 0,01                 | 22,85              | -0,18                        | 164,15              | 0,01                 |
| 5-O-galloylquinic acid            | C <sub>14</sub> H <sub>16</sub> O <sub>10</sub> | Hydroxybenzoic acid          | 344,27              | 22,93                       | 22,87              | 0,06                         | 344,28              | -0,01                | 23,1               | -0,17                        | 344,28              | -0,01                |
| Protocatechuic acid 4-O-glucoside | C <sub>13</sub> H <sub>16</sub> O <sub>9</sub>  | Hydroxybenzoic acid          | 316,26              | 22,93                       | 23,08              | -0,15                        | 316,26              | 0                    | 23,09              | -0,16                        | 316,26              | 0                    |
| P-coumaroyl tartaric acid         | C <sub>13</sub> H <sub>12</sub> O <sub>8</sub>  | Hydroxycinnamic acid         | 296,23              | 23,55                       | 23,63              | -0,08                        | 296,23              | 0                    | 23,41              | 0,14                         | 296,23              | 0                    |
| 2-hydroxybenzoic acid             | C <sub>7</sub> H <sub>6</sub> O <sub>3</sub>    | Hydroxybenzoic acid          | 138,12              | 23,56                       | 23,47              | 0,09                         | 138,13              | -0,01                | 23,56              | 0                            | 138,13              | -0,01                |

|                                     |                                                 |                      |        |       |       |       |        |       |       |       |        |       |
|-------------------------------------|-------------------------------------------------|----------------------|--------|-------|-------|-------|--------|-------|-------|-------|--------|-------|
| 3-hydroxybenzoic acid               | C <sub>7</sub> H <sub>6</sub> O <sub>3</sub>    | Hydroxybenzoic acid  | 138,12 | 23,56 | 23,47 | 0,09  | 138,13 | -0,01 | 23,56 | 0     | 138,13 | -0,01 |
| 4-hydroxybenzoic acid               | C <sub>7</sub> H <sub>6</sub> O <sub>3</sub>    | Hydroxybenzoic acid  | 138,12 | 23,56 | 23,47 | 0,09  | 138,13 | -0,01 | 23,56 | 0     | 138,13 | -0,01 |
| Vanillic acid                       | C <sub>8</sub> H <sub>8</sub> O <sub>4</sub>    | Hydroxybenzoic acid  | 168,14 | 23,84 | 23,69 | 0,15  | 168,15 | -0,01 | 23,66 | 0,18  | 168,15 | -0,01 |
| Caffeoyl tartaric acid              | C <sub>13</sub> H <sub>12</sub> O <sub>9</sub>  | Hydroxycinnamic acid | 312,23 | 23,85 | 23,64 | 0,21  | 312,22 | 0,01  | 24,08 | -0,23 | 312,22 | 0,01  |
| Sinapic acid                        | C <sub>11</sub> H <sub>12</sub> O <sub>5</sub>  | Hydroxycinnamic acid | 224,21 | 23,91 | 24    | -0,09 | 224,21 | 0     | 23,94 | -0,03 | 224,21 | 0     |
| Valoneic acid dilactone             | C <sub>21</sub> H <sub>10</sub> O <sub>13</sub> | Hydroxybenzoic acid  | 470,29 | 24,04 | NA    | NA    | NA     | NA    | 24,1  | -0,06 | 470,3  | -0,01 |
| Gallic acid 3-O-gallate             | C <sub>14</sub> H <sub>10</sub> O <sub>9</sub>  | Hydroxybenzoic acid  | 322,22 | 24,05 | 24,28 | -0,23 | 322,22 | 0     | 23,93 | 0,12  | 322,22 | 0     |
| 4-hydroxybenzoic acid 4-O-glucoside | C <sub>13</sub> H <sub>16</sub> O <sub>8</sub>  | Hydroxybenzoic acid  | 300,26 | 25,42 | 25,45 | -0,03 | 300,26 | 0     | 25,24 | 0,18  | 300,26 | 0     |
| Ellagic acid acetyl arabinoside     | C <sub>21</sub> H <sub>16</sub> O <sub>13</sub> | Hydroxybenzoic acid  | 476,34 | 25,59 | 25,76 | -0,17 | 476,35 | -0,01 | NA    | NA    | NA     | NA    |
| Ellagic acid acetyl-xyloside        | C <sub>21</sub> H <sub>16</sub> O <sub>13</sub> | Hydroxybenzoic acid  | 476,34 | 25,59 | 25,76 | -0,17 | 476,35 | -0,01 | NA    | NA    | NA     | NA    |
| Caffeoyl aspartic acid              | C <sub>13</sub> H <sub>13</sub> NO <sub>7</sub> | Hydroxycinnamic acid | 295,24 | 26,37 | 26,59 | -0,22 | 295,25 | -0,01 | NA    | NA    | NA     | NA    |
| Hydrocaffeic acid                   | C <sub>9</sub> H <sub>8</sub> O <sub>5</sub>    | Hydroxycinnamic acid | 196,16 | 26,42 | 26,62 | -0,2  | 196,15 | 0,01  | 26,42 | 0     | 196,15 | 0,01  |
| Gallic acid                         | C <sub>7</sub> H <sub>6</sub> O <sub>5</sub>    | Hydroxybenzoic acid  | 170,12 | 26,46 | 26,59 | -0,13 | 170,12 | 0     | 26,69 | -0,23 | 170,12 | 0     |
| Ellagic acid                        | C <sub>14</sub> H <sub>6</sub> O <sub>8</sub>   | Hydroxybenzoic acid  | 302,19 | 26,55 | 26,64 | -0,09 | 302,2  | -0,01 | 26,3  | 0,25  | 302,2  | -0,01 |
| Avenanthramide 2P                   | C <sub>16</sub> H <sub>13</sub> NO <sub>5</sub> | Hydroxycinnamic acid | 299,28 | 26,61 | 26,67 | -0,06 | 299,27 | 0,01  | NA    | NA    | NA     | NA    |
| Caffeic acid 4-O-glucoside          | C <sub>15</sub> H <sub>18</sub> O <sub>9</sub>  | Hydroxycinnamic acid | 342,29 | 26,71 | 26,65 | 0,06  | 342,3  | -0,01 | 26,78 | -0,07 | 342,31 | -0,02 |
| Caffeoyl glucose                    | C <sub>15</sub> H <sub>18</sub> O <sub>9</sub>  | Hydroxycinnamic acid | 342,29 | 26,71 | 26,65 | 0,06  | 342,3  | -0,01 | 26,78 | -0,07 | 342,31 | -0,02 |
| P-coumaric acid 4-O-glucoside       | C <sub>15</sub> H <sub>18</sub> O <sub>8</sub>  | Hydroxycinnamic acid | 326,29 | 27,32 | 27,27 | 0,05  | 326,31 | -0,02 | 27,28 | 0,04  | 326,31 | -0,02 |
| P-coumaroylquinic acid              | C <sub>16</sub> H <sub>18</sub> O <sub>8</sub>  | Hydroxycinnamic acid | 338,31 | 27,73 | 27,88 | -0,15 | 338,31 | 0     | 27,84 | -0,11 | 338,31 | 0     |

|                           |                                              |                     |        |       |       |      |        |   |      |       |        |   |
|---------------------------|----------------------------------------------|---------------------|--------|-------|-------|------|--------|---|------|-------|--------|---|
| 2,3-dihydroxybenzoic acid | C <sub>7</sub> H <sub>6</sub> O <sub>4</sub> | Hydroxybenzoic acid | 154,12 | 35,26 | 35,25 | 0,01 | 154,12 | 0 | 35,3 | -0,04 | 154,12 | 0 |
| 2,4-dihydroxybenzoic acid | C <sub>7</sub> H <sub>6</sub> O <sub>4</sub> | Hydroxybenzoic acid | 154,12 | 35,26 | 35,25 | 0,01 | 154,12 | 0 | 35,3 | -0,04 | 154,12 | 0 |
| 2,5-dihydroxybenzoic acid | C <sub>7</sub> H <sub>6</sub> O <sub>4</sub> | Hydroxybenzoic acid | 154,12 | 35,26 | 35,25 | 0,01 | 154,12 | 0 | 35,3 | -0,04 | 154,12 | 0 |
| 2,6-dihydroxybenzoic acid | C <sub>7</sub> H <sub>6</sub> O <sub>4</sub> | Hydroxybenzoic acid | 154,12 | 35,26 | 35,25 | 0,01 | 154,12 | 0 | 35,3 | -0,04 | 154,12 | 0 |
| Protocatechuic acid       | C <sub>7</sub> H <sub>6</sub> O <sub>4</sub> | Hydroxybenzoic acid | 154,12 | 35,26 | 35,25 | 0,01 | 154,12 | 0 | 35,3 | -0,04 | 154,12 | 0 |

NA: Not among the most abundant in the extract.

**Table S3.** Flavonoids found in MS by RP-HPLC-MS/MS in negative mode.

| Name                       | Molecular Formula                               | Subclass     | Expected Mass (m/z) | Expected Retention Time (s) | HAE                |                              |                     |                      | RAE                |                              |                     |                      |
|----------------------------|-------------------------------------------------|--------------|---------------------|-----------------------------|--------------------|------------------------------|---------------------|----------------------|--------------------|------------------------------|---------------------|----------------------|
|                            |                                                 |              |                     |                             | Retention Time (s) | Retention Time Variation (s) | Observed Mass (m/z) | Mass Variation (m/z) | Retention Time (s) | Retention Time Variation (s) | Observed Mass (m/z) | Mass Variation (m/z) |
| Kaempferol                 | C <sub>15</sub> H <sub>10</sub> O <sub>6</sub>  | Flavonol     | 286,23              | 20,99                       | 21,01              | -0,02                        | 286,24              | -0,01                | 21,01              | -0,02                        | 286,24              | -0,01                |
| Luteolin                   | C <sub>15</sub> H <sub>10</sub> O <sub>6</sub>  | Flavone      | 286,23              | 20,99                       | 21,01              | -0,02                        | 286,24              | -0,01                | 21,01              | -0,02                        | 286,24              | -0,01                |
| Scutellarein               | C <sub>15</sub> H <sub>10</sub> O <sub>6</sub>  | Flavone      | 286,24              | 20,99                       | 21,01              | -0,02                        | 286,24              | 0                    | 21,01              | -0,02                        | 286,24              | 0                    |
| Cyanidin                   | C <sub>15</sub> H <sub>11</sub> O <sub>6</sub>  | Anthocyanin  | 287,24              | 21                          | 21,02              | -0,02                        | 287,24              | 0                    | 21                 | 0                            | 287,24              | 0                    |
| 6-hydroxyluteolin          | C <sub>15</sub> H <sub>10</sub> O <sub>7</sub>  | Flavone      | 302,23              | 21,13                       | 21,14              | -0,01                        | 302,24              | -0,01                | 21,15              | -0,02                        | 302,24              | -0,01                |
| Apigenin 7-O-glucuronide   | C <sub>21</sub> H <sub>18</sub> O <sub>11</sub> | Flavone      | 446,4               | 22,24                       | NA                 | NA                           | NA                  | NA                   | 22,26              | -0,02                        | 446,36              | 0,04                 |
| Cirsimaritin               | C <sub>17</sub> H <sub>14</sub> O <sub>6</sub>  | Flavone      | 314,29              | 22,64                       | NA                 | NA                           | NA                  | NA                   | 22,63              | 0,01                         | 314,29              | 0                    |
| Isorhamnetin               | C <sub>16</sub> H <sub>12</sub> O <sub>7</sub>  | Flavonol     | 316,26              | 22,29                       | 22,94              | -0,65                        | 316,26              | 0                    | 22,97              | -0,68                        | 316,26              | 0                    |
| Nepetin                    | C <sub>16</sub> H <sub>12</sub> O <sub>7</sub>  | Flavone      | 316,26              | 22,29                       | 22,94              | -0,65                        | 316,26              | 0                    | 22,97              | -0,68                        | 316,26              | 0                    |
| Ramnetin                   | C <sub>16</sub> H <sub>12</sub> O <sub>7</sub>  | Flavonol     | 316,26              | 22,29                       | 22,94              | -0,65                        | 316,26              | 0                    | 22,97              | -0,68                        | 316,26              | 0                    |
| Daidzin                    | C <sub>21</sub> H <sub>20</sub> O <sub>9</sub>  | Isoflavonoid | 416,38              | 24,32                       | 24,3               | 0,02                         | 416,38              | 0                    | 24,32              | 0                            | 416,38              | 0                    |
| Myricetin 3-O-arabinoside  | C <sub>20</sub> H <sub>18</sub> O <sub>12</sub> | Flavonol     | 450,35              | 25,18                       | NA                 | NA                           | NA                  | NA                   | 25,16              | 0,02                         | 450,36              | -0,01                |
| Hispidulin                 | C <sub>16</sub> H <sub>12</sub> O <sub>6</sub>  | Flavone      | 300,26              | 25,42                       | 25,44              | -0,02                        | 300,26              | 0                    | 25,46              | -0,04                        | 300,26              | 0                    |
| Peonidin                   | C <sub>16</sub> H <sub>13</sub> O <sub>6</sub>  | Anthocyanin  | 301,27              | 25,42                       | 25,44              | -0,02                        | 301,27              | 0                    | 25,46              | -0,04                        | 301,27              | 0                    |
| Kaempferide                | C <sub>16</sub> H <sub>11</sub> O <sub>6</sub>  | Flavonol     | 299,25              | 25,43                       | 25,44              | -0,01                        | 299,26              | -0,01                | 25,48              | -0,05                        | 299,26              | -0,01                |
| Kaempferol 3-O-glucoronide | C <sub>21</sub> H <sub>18</sub> O <sub>12</sub> | Flavonol     | 462,36              | 25,54                       | 25,56              | -0,02                        | 462,36              | 0                    | 25,6               | -0,06                        | 462,36              | 0                    |

|                          |                                                 |              |        |       |       |       |        |       |       |       |        |       |
|--------------------------|-------------------------------------------------|--------------|--------|-------|-------|-------|--------|-------|-------|-------|--------|-------|
| Luteolin 7-O-glucuronide | C <sub>21</sub> H <sub>18</sub> O <sub>12</sub> | Flavone      | 462,36 | 25,54 | 25,56 | -0,02 | 462,36 | 0     | 25,6  | -0,06 | 462,36 | 0     |
| Isoxanthohumol           | C <sub>21</sub> H <sub>22</sub> O <sub>5</sub>  | Flavonone    | 354,39 | 25,83 | 25,98 | -0,15 | 354,39 | 0     | 26,02 | -0,19 | 354,39 | 0     |
| Xanthohumol              | C <sub>21</sub> H <sub>22</sub> O <sub>5</sub>  | Chalcone     | 354,39 | 25,83 | 25,98 | -0,15 | 354,39 | 0     | 26,02 | -0,19 | 354,39 | 0     |
| 6,8-Dihydroxykaempferol  | C <sub>15</sub> H <sub>10</sub> O <sub>8</sub>  | Flavonol     | 318,24 | 26,59 | NA    | NA    | NA     | NA    | 26,65 | -0,06 | 318,24 | 0     |
| Myricetin                | C <sub>15</sub> H <sub>10</sub> O <sub>8</sub>  | Flavonol     | 318,24 | 26,59 | NA    | NA    | NA     | NA    | 26,65 | -0,06 | 318,24 | 0     |
| Morin                    | C <sub>15</sub> H <sub>10</sub> O <sub>7</sub>  | Flavonol     | 302,24 | 27,38 | 27,36 | 0,02  | 302,22 | 0,02  | 27,43 | -0,05 | 302,22 | 0,02  |
| 6-Prenylnaringenin       | C <sub>20</sub> H <sub>20</sub> O <sub>5</sub>  | Flavonol     | 340,36 | 28,64 | 28,67 | -0,03 | 340,38 | -0,02 | 28,85 | -0,21 | 340,38 | -0,02 |
| 8-Prenylnaringenin       | C <sub>20</sub> H <sub>20</sub> O <sub>5</sub>  | Flavonol     | 340,36 | 28,64 | 28,67 | -0,03 | 340,38 | -0,02 | 28,85 | -0,21 | 340,38 | -0,02 |
| Daidzein                 | C <sub>15</sub> H <sub>10</sub> O <sub>4</sub>  | Isoflavonoid | 254,34 | 29,85 | 29,92 | -0,07 | 254,22 | 0,12  | NA    | NA    | NA     | NA    |

NA: Not among the most abundant in the extract.

**Table S4.** Flavonoids found in MS by RP-HPLC-MS/MS in positive mode.

| Name                         | Molecular Formula                              | Subclass        | Expected Mass (m/z) | HAE                         |                    |                              |                     | RAE                  |                    |                              |                     |                      |
|------------------------------|------------------------------------------------|-----------------|---------------------|-----------------------------|--------------------|------------------------------|---------------------|----------------------|--------------------|------------------------------|---------------------|----------------------|
|                              |                                                |                 |                     | Expected Retention Time (s) | Retention Time (s) | Retention Time Variation (s) | Observed Mass (m/z) | Mass Variation (m/z) | Retention Time (s) | Retention Time Variation (s) | Observed Mass (m/z) | Mass Variation (m/z) |
| Kaempferol                   | C <sub>15</sub> H <sub>10</sub> O <sub>6</sub> | Flavonol        | 286,23              | 20,99                       | 21,23              | -0,24                        | 286,24              | -0,01                | 21,12              | -0,13                        | 286,24              | -0,01                |
| Luteolin                     | C <sub>15</sub> H <sub>10</sub> O <sub>6</sub> | Flavone         | 286,23              | 20,99                       | 21,23              | -0,24                        | 286,24              | -0,01                | 21,12              | -0,13                        | 286,24              | -0,01                |
| Scutellarein                 | C <sub>15</sub> H <sub>10</sub> O <sub>6</sub> | Flavone         | 286,24              | 20,99                       | 21,23              | -0,24                        | 286,24              | 0                    | 21,12              | -0,13                        | 286,24              | 0                    |
| Cyanidin                     | C <sub>15</sub> H <sub>11</sub> O <sub>6</sub> | Anthocyanin     | 287,24              | 21                          | 21,02              | -0,02                        | 287,24              | 0                    | 21,24              | -0,24                        | 287,24              | 0                    |
| 6-hydroxyluteolin            | C <sub>15</sub> H <sub>10</sub> O <sub>7</sub> | Flavone         | 302,23              | 21,13                       | 21,18              | -0,05                        | 302,23              | 0                    | 21,18              | -0,05                        | 302,23              | 0                    |
| Isorhamnetin                 | C <sub>16</sub> H <sub>12</sub> O <sub>7</sub> | Flavonol        | 316,26              | 22,93                       | 23,08              | -0,15                        | 316,26              | 0                    | 23,09              | -0,16                        | 316,26              | 0                    |
| Nepetin                      | C <sub>16</sub> H <sub>12</sub> O <sub>7</sub> | Flavone         | 316,26              | 22,93                       | 23,08              | -0,15                        | 316,26              | 0                    | 23,09              | -0,16                        | 316,26              | 0                    |
| Ramnetin                     | C <sub>16</sub> H <sub>12</sub> O <sub>7</sub> | Flavonol        | 316,26              | 22,93                       | 23,08              | -0,15                        | 316,26              | 0                    | 23,09              | -0,16                        | 316,26              | 0                    |
| Daidzin                      | C <sub>21</sub> H <sub>20</sub> O <sub>9</sub> | Isoflavonoid    | 416,38              | 24,32                       | 24,28              | 0,04                         | 416,37              | 0,01                 | 24,26              | 0,06                         | 416,37              | 0,01                 |
| Phoretin                     | C <sub>15</sub> H <sub>14</sub> O <sub>5</sub> | Dihydrochalcone | 274,27              | 24,92                       | 25,05              | -0,13                        | 274,26              | 0,01                 | 25,05              | -0,13                        | 274,26              | 0,01                 |
| Eriodictyol                  | C <sub>15</sub> H <sub>12</sub> O <sub>6</sub> | Flavonone       | 288,25              | 24,96                       | 25,01              | -0,05                        | 288,25              | 0                    | 24,89              | 0,07                         | 288,25              | 0                    |
| Sakuranetin                  | C <sub>16</sub> H <sub>14</sub> O <sub>5</sub> | Flavonone       | 286,27              | 25,26                       | 25,49              | -0,23                        | 286,27              | 0                    | 25,41              | -0,15                        | 286,27              | 0                    |
| Hispidulin                   | C <sub>16</sub> H <sub>12</sub> O <sub>6</sub> | Flavone         | 300,26              | 25,42                       | 25,45              | -0,03                        | 300,26              | 0                    | 25,24              | 0,18                         | 300,26              | 0                    |
| Peonidin                     | C <sub>16</sub> H <sub>13</sub> O <sub>6</sub> | Anthocyanin     | 301,27              | 25,42                       | 25,41              | 0,01                         | 301,27              | 0                    | 25,41              | 0,01                         | 301,27              | 0                    |
| Kaempferide                  | C <sub>16</sub> H <sub>11</sub> O <sub>6</sub> | Flavonol        | 299,25              | 25,43                       | 25,44              | -0,01                        | 299,26              | -0,01                | 25,67              | -0,24                        | 299,26              | -0,01                |
| Pelargonidin 3-O-arabinoside | C <sub>20</sub> H <sub>19</sub> O <sub>9</sub> | Anthocyanin     | 403,36              | 25,52                       | 25,45              | 0,07                         | 403,36              | 0                    | 25,36              | 0,16                         | 403,36              | 0                    |

|                              |                                                 |              |        |       |       |       |        |       |       |       |        |       |
|------------------------------|-------------------------------------------------|--------------|--------|-------|-------|-------|--------|-------|-------|-------|--------|-------|
| Kaempferol 3-O-glucuronide   | C <sub>21</sub> H <sub>18</sub> O <sub>12</sub> | Flavonol     | 462,36 | 25,54 | 25,62 | -0,08 | 462,37 | -0,01 | 25,29 | 0,25  | 462,37 | -0,01 |
| Luteolin 7-O-glucuronide     | C <sub>21</sub> H <sub>18</sub> O <sub>12</sub> | Flavone      | 462,36 | 25,54 | 25,62 | -0,08 | 462,37 | -0,01 | 25,29 | 0,25  | 462,37 | -0,01 |
| Isoxanthohumol               | C <sub>21</sub> H <sub>22</sub> O <sub>5</sub>  | Flavonone    | 354,39 | 25,83 | NA    | NA    | NA     | NA    | 25,88 | -0,05 | 354,41 | -0,02 |
| Xanthohumol                  | C <sub>21</sub> H <sub>22</sub> O <sub>5</sub>  | Chalcone     | 354,39 | 25,83 | NA    | NA    | NA     | NA    | 25,88 | -0,05 | 354,41 | -0,02 |
| Myricetin                    | C <sub>15</sub> H <sub>10</sub> O <sub>8</sub>  | Flavonol     | 318,24 | 26,59 | 26,68 | -0,09 | 318,23 | 0,01  | 26,62 | -0,03 | 318,23 | 0,01  |
| Delphinidin 3-O-arabinoside  | C <sub>20</sub> H <sub>19</sub> O <sub>11</sub> | Anthocyanin  | 435,36 | 26,93 | 27,06 | -0,13 | 435,35 | 0,01  | 26,86 | 0,07  | 435,35 | 0,01  |
| Biochanin A                  | C <sub>16</sub> H <sub>12</sub> O <sub>5</sub>  | Isoflavonoid | 284,26 | 27,17 | 27,1  | 0,07  | 284,27 | -0,01 | 27,37 | -0,2  | 284,27 | -0,01 |
| Geraldone                    | C <sub>16</sub> H <sub>12</sub> O <sub>5</sub>  | Flavone      | 284,26 | 27,17 | 27,1  | 0,07  | 284,27 | -0,01 | 27,37 | -0,2  | 284,27 | -0,01 |
| Glycitein                    | C <sub>16</sub> H <sub>12</sub> O <sub>5</sub>  | Isoflavonoid | 284,26 | 27,17 | 27,1  | 0,07  | 284,27 | -0,01 | 27,37 | -0,2  | 284,27 | -0,01 |
| Methylgalangin               | C <sub>16</sub> H <sub>12</sub> O <sub>5</sub>  | Flavonol     | 284,26 | 27,17 | 27,1  | 0,07  | 284,27 | -0,01 | 27,37 | -0,2  | 284,27 | -0,01 |
| Morin                        | C <sub>15</sub> H <sub>10</sub> O <sub>7</sub>  | Flavonol     | 302,24 | 27,38 | 27,39 | -0,01 | 302,22 | 0,02  | 27,3  | 0,08  | 302,23 | 0,01  |
| Isoharmnetin 3-O-glucuronide | C <sub>22</sub> H <sub>20</sub> O <sub>13</sub> | Flavonol     | 492,39 | 27,7  | 27,71 | -0,01 | 492,38 | 0,01  | NA    | NA    | NA     | NA    |
| 6"-O-acetylglycitin          | C <sub>24</sub> H <sub>24</sub> O <sub>11</sub> | Isoflavonoid | 488,44 | 27,97 | 27,84 | 0,13  | 488,44 | 0     | 27,8  | 0,17  | 488,44 | 0     |
| 6"-O-malonylgenistin         | C <sub>24</sub> H <sub>22</sub> O <sub>13</sub> | Isoflavonoid | 518,42 | 29,64 | NA    | NA    | NA     | NA    | 29,43 | 0,21  | 518,42 | 0     |

NA: Not among the most abundant in the extract.



**Table S5.** Stilbenes found in *MS* by RP-HPLC-MS/MS in negative mode.

| Name        | Molecular Formula                              | Subclass | Expected Mass (m/z) | Expected Retention Time (s) | HAE                |                              |                     |                      | RAE                |                              |                     |                      |
|-------------|------------------------------------------------|----------|---------------------|-----------------------------|--------------------|------------------------------|---------------------|----------------------|--------------------|------------------------------|---------------------|----------------------|
|             |                                                |          |                     |                             | Retention Time (s) | Retention Time Variation (s) | Observed Mass (m/z) | Mass Variation (m/z) | Retention Time (s) | Retention Time Variation (s) | Observed Mass (m/z) | Mass Variation (m/z) |
| Resveratrol | C <sub>14</sub> H <sub>12</sub> O <sub>3</sub> | Stilbene | 228,24              | 23,83                       | 23,58              | 0,25                         | 228,23              | 0,01                 | NA                 | NA                           | NA                  | NA                   |

NA: Not among the most abundant in the extract.

**Table S6.** Stilbenes found in *MS* by RP-HPLC-MS/MS in positive mode.

| Name          | Molecular Formula                              | Subclass | Expected Mass (m/z) | Expected Retention Time (s) | HAE                |                              |                     |                      | RAE                |                              |                     |                      |
|---------------|------------------------------------------------|----------|---------------------|-----------------------------|--------------------|------------------------------|---------------------|----------------------|--------------------|------------------------------|---------------------|----------------------|
|               |                                                |          |                     |                             | Retention Time (s) | Retention Time Variation (s) | Observed Mass (m/z) | Mass Variation (m/z) | Retention Time (s) | Retention Time Variation (s) | Observed Mass (m/z) | Mass Variation (m/z) |
| Resveratrol   | C <sub>14</sub> H <sub>12</sub> O <sub>3</sub> | Stilbene | 228,24              | 23,83                       | 23,71              | 0,12                         | 228,23              | 0,01                 | 23,58              | 0,25                         | 228,23              | 0,01                 |
| Pterostilbene | C <sub>16</sub> H <sub>16</sub> O <sub>3</sub> | Stilbene | 256,29              | 24,18                       | 24,18              | 0                            | 256,3               | -0,01                | NA                 | NA                           | NA                  | NA                   |

NA: Not among the most abundant in the extract.

**Table S7.** Other polyphenol compounds found in *MS* by RP-HPLC-MS/MS in negative mode.

| Name                     | Molecular Formula                              | Subclass        | Expected Mass (m/z) | Expected Retention Time (s) | HAE                |                              |                     |                      | RAE                |                              |                     |                      |
|--------------------------|------------------------------------------------|-----------------|---------------------|-----------------------------|--------------------|------------------------------|---------------------|----------------------|--------------------|------------------------------|---------------------|----------------------|
|                          |                                                |                 |                     |                             | Retention Time (s) | Retention Time Variation (s) | Observed Mass (m/z) | Mass Variation (m/z) | Retention Time (s) | Retention Time Variation (s) | Observed Mass (m/z) | Mass Variation (m/z) |
| 5-heneicosenylresorcinol | C <sub>27</sub> H <sub>46</sub> O <sub>2</sub> | Alkylphenol     | 402,7               | 0,86                        | 0,94               | -0,08                        | 401,99              | 0,71                 | NA                 | NA                           | NA                  | NA                   |
| Esculin                  | C <sub>15</sub> H <sub>16</sub> O <sub>9</sub> | Hydroxycoumarin | 340,28              | 26,37                       | NA                 | NA                           | NA                  | NA                   | 26,39              | -0,02                        | 340,29              | -0,01                |

NA: Not among the most abundant in the extract.

**Table S8.** Other polyphenol compounds found in MS by RP-HPLC-MS/MS in positive mode.

| Name                      | Molecular Formula                              | Subclass            | Expected Mass (m/z) | Expected Retention Time (s) | HAE                |                              |                     |                      | RAE                |                              |                     |                      |
|---------------------------|------------------------------------------------|---------------------|---------------------|-----------------------------|--------------------|------------------------------|---------------------|----------------------|--------------------|------------------------------|---------------------|----------------------|
|                           |                                                |                     |                     |                             | Retention Time (s) | Retention Time Variation (s) | Observed Mass (m/z) | Mass Variation (m/z) | Retention Time (s) | Retention Time Variation (s) | Observed Mass (m/z) | Mass Variation (m/z) |
| Psoralen                  | C <sub>11</sub> H <sub>6</sub> O <sub>3</sub>  | Furanocoumarin      | 186,16              | 1                           | NA                 | NA                           | NA                  | NA                   | 0,9                | 0,1                          | 186,17              | -0,01                |
| Pyrogallol                | C <sub>6</sub> H <sub>6</sub> O <sub>3</sub>   | Other polyphenol    | 126,11              | 1,05                        | 1,04               | 0,01                         | 126,11              | 0                    | 1,07               | -0,02                        | 126,11              | 0                    |
| Scopoletin                | C <sub>10</sub> H <sub>8</sub> O <sub>4</sub>  | Hydroxycoumarin     | 192,16              | 7,98                        | 7,86               | 0,12                         | 192,16              | 0                    | 8,2                | -0,22                        | 192,16              | 0                    |
| 3,4-dihydroxyphenylglycol | C <sub>8</sub> H <sub>10</sub> O <sub>4</sub>  | Other polyphenol    | 170,16              | 12,87                       | 12,67              | 0,2                          | 170,17              | -0,01                | 13,04              | -0,17                        | 170,17              | -0,01                |
| Syringaldehyde            | C <sub>9</sub> H <sub>10</sub> O <sub>4</sub>  | Hydroxybenzaldehyde | 182,17              | 18,69                       | 18,83              | -0,14                        | 182,16              | 0,01                 | 18,76              | -0,07                        | 182,16              | 0,01                 |
| Coumestrol                | C <sub>15</sub> H <sub>8</sub> O <sub>5</sub>  | Other polyphenol    | 268,22              | 20,84                       | 21,05              | -0,21                        | 268,23              | -0,01                | NE                 | NE                           | NE                  | NE                   |
| 4-hydroxycoumarin         | C <sub>9</sub> H <sub>6</sub> O <sub>3</sub>   | Hydroxycoumarin     | 162,44              | 21,13                       | 20,97              | 0,16                         | 162,14              | 0,3                  | 21,36              | -0,23                        | 162,14              | 0,3                  |
| Protocatechuic aldehyde   | C <sub>7</sub> H <sub>6</sub> O <sub>3</sub>   | Hydroxybenzaldehyde | 138,12              | 23,56                       | 23,47              | 0,09                         | 138,13              | -0,01                | 23,56              | 0                            | 138,13              | -0,01                |
| 1,4-Naphthoquinone        | C <sub>10</sub> H <sub>6</sub> O <sub>2</sub>  | Naphthoquinone      | 158,15              | 23,83                       | 23,8               | 0,03                         | 158,15              | 0                    | 23,86              | -0,03                        | 158,15              | 0                    |
| Juglone                   | C <sub>10</sub> H <sub>6</sub> O <sub>3</sub>  | Naphthoquinone      | 174,15              | 23,94                       | 24,05              | -0,11                        | 174,15              | 0                    | NA                 | NA                           | NA                  | NA                   |
| 3-methylcatechol          | C <sub>7</sub> H <sub>8</sub> O <sub>2</sub>   | Alkylphenol         | 124,14              | 24,89                       | 24,97              | -0,08                        | 124,12              | 0,02                 | 24,99              | -0,1                         | 124,12              | 0,02                 |
| 4-methylcatechol          | C <sub>7</sub> H <sub>8</sub> O <sub>2</sub>   | Alkylphenol         | 124,14              | 24,89                       | 24,97              | -0,08                        | 124,12              | 0,02                 | 24,99              | -0,1                         | 124,12              | 0,02                 |
| Guaiacol                  | C <sub>7</sub> H <sub>8</sub> O <sub>2</sub>   | Methoxyphenol       | 124,14              | 24,89                       | 24,97              | -0,08                        | 124,12              | 0,02                 | 24,99              | -0,1                         | 124,12              | 0,02                 |
| Phlorin                   | C <sub>12</sub> H <sub>16</sub> O <sub>8</sub> | Other polyphenol    | 288,25              | 24,96                       | 25,01              | -0,05                        | 288,25              | 0                    | 24,89              | 0,07                         | 288,25              | 0                    |
| Esculetin                 | C <sub>9</sub> H <sub>6</sub> O <sub>4</sub>   | Hydroxycoumarin     | 178,14              | 25                          | 25,22              | -0,22                        | 178,13              | 0,01                 | 24,87              | 0,13                         | 178,13              | 0,01                 |

|                 |                                                |                      |        |       |       |       |        |      |       |       |        |      |
|-----------------|------------------------------------------------|----------------------|--------|-------|-------|-------|--------|------|-------|-------|--------|------|
| Catechol        | C <sub>6</sub> H <sub>6</sub> O <sub>2</sub>   | Other polyphenol     | 110,11 | 26,13 | 25,96 | 0,17  | 110,1  | 0,01 | 26,15 | -0,02 | 110,1  | 0,01 |
| Esculin         | C <sub>15</sub> H <sub>16</sub> O <sub>9</sub> | Hydroxybenzaldehyde  | 340,28 | 26,37 | 26,43 | -0,06 | 340,28 | 0    | 26,43 | -0,06 | 340,28 | 0    |
| Gallic aldehyde | C <sub>7</sub> H <sub>6</sub> O <sub>4</sub>   | Hhidroxibenzaldehído | 154,12 | 35,26 | 35,25 | 0,01  | 154,12 | 0    | 35,3  | -0,04 | 154,12 | 0    |
| Isopimpinelin   | C <sub>13</sub> H <sub>10</sub> O <sub>5</sub> | Furanocoumarin       | 246,21 | 47,38 | 47,28 | 0,1   | 246,21 | 0    | 47,51 | -0,13 | 246,21 | 0    |

NA: Not among the most abundant in the extract.
